1 **Bacterial predation on T4 phages**

2 Jean-Jacques Godon<sup>a</sup>, Ariane Bize<sup>b</sup>, Hoang Ngo<sup>b</sup>, Laurent Cauquil<sup>c</sup>, Mathieu Almeida<sup>d</sup>,  
3 Marie Agnès Petit<sup>e</sup>, Olivier Zemb<sup>c</sup>.

4 **Affiliations**

5 <sup>a</sup>INRAE, Univ Montpellier, LBE, Narbonne, France, 11100

6 <sup>b</sup>INRAE, Hydrosyst & Bioproc Res Unit, Antony, France, 92160

7 <sup>c</sup>INRAE, Univ Toulouse, ENVT, GenPhySE, Toulouse, France, 31320

8 <sup>d</sup>INRAE, MetaGenoPolis, Jouy-en-Josas, France, 78350

9 <sup>e</sup>Université Paris- Saclay, INRAE, AgroParisTech, Micalis Institute, Jouy-en-Josas,  
10 France, 78350

11 \* Paste corresponding author name(s) here.

12 **Email:** [olivier.zemb@inrae.fr](mailto:olivier.zemb@inrae.fr)

13 **Author Contributions:** J.J.G., O.Z., A.B. and N.H. designed and performed the  
14 experiments; J.J.G., O.Z., L.C. and M.A. performed computational experiments; J.J.G.,  
15 O.Z., L.C., M.A. and M.A.P. contributed lineaging data and expertise; J.J.G. and O.Z.

16 prepared the manuscript with assistance from all authors; J.J.G. and O.Z. supervised and

17 directed the research.

18 Competing Interest Statement: no competing interest.

19 **Classification:** Microbiology

20 **Keywords:** bacteriophage, Aeromonas, Stable-isotope probing

21 Abstract

22 **Background: Bacterial consumption of viruses has never yet been**  
23 **reported, even though bacteria feed on almost anything. Viruses are**  
24 **omnipresent predators for all organisms, but have no acknowledged active**  
25 **biocontrol. The viral biomass undoubtedly reintegrates the trophic cycles,**  
26 **however the mechanisms of this phase still remain unknown.**

27 **Methods: Here, we used stable isotope probing with  $^{13}\text{C}$  labelled T4 phages**  
28 **to monitor the increase of density of the bacterial DNA concomitant with**  
29 **the decrease of plaque forming units. We used  $^{12}\text{C}$  T4 phages as control.**

30 **Results: T4 phage disappearance in wastewater sludge was found to occur**  
31 **mainly through predation by *Aeromonadacea*. Phage consumption also**  
32 **favours significant *in situ* bacterial growth. Furthermore, an isolated**  
33 **strain of *Aeromonas* was observed to grow on T4 phages as sole source of**  
34 **carbon, nitrogen and phosphorus.**

35 **Conclusions: bacterial species are capable of consuming bacteriophages *in***  
36 ***situ*, which is likely a widespread and underestimated type of biocontrol.**

37 **This assay is anticipated as a starting point for harnessing the bacterial**

38 **potential in limiting the diffusion of harmful viruses within environments**  
39 **such as gut or water.**

40

41 Introduction

42 For any type of bacteria, the presence of viruses may present a significant opportunity for  
43 feeding. Indeed, viruses represent 0.2 gigatons of carbon on Earth(Bar-On *et al.*, 2018).  
44 For example, the major capsid protein of the T4-like bacteriophage family is one of the  
45 most prevalent proteins in the biosphere(Comeau and Krisch, 2008). Therefore phages  
46 represent a major potential carbon source into which bacteria may tap. Furthermore,  
47 viruses are also a potential source of phosphorus(Jover *et al.*, 2014).

48 No bacterium preying on viruses have been described even though bacterial extracellular  
49 proteases are able to degrade certain bacteriophages in anaerobic wastewater treatment  
50 plants, in pure cultures(Mondal *et al.*, 2015) and in soil(Nasser *et al.*, 2002). In seawater,  
51 the only reported biotic pressure arises from marine ciliates that have been co-incubated  
52 with viruses and bacteria(Gonzalez and Suttle, 1993). This observation is also supported  
53 by the recent discovery of viral DNA in free-living eukaryotic cells(Brown *et al.*, 2020).

54 Here, we show that specific bacteria can indeed degrade T4 bacteriophages *in situ*, and  
55 we confirm this observation in pure culture.

## 56 Results

57 When searching for bacteriophage consumption activity, sludge from wastewater  
58 treatment plants is a relevant microbiota to investigate, as it boasts a high degradation  
59 capacity. In this work, the stable isotope probing method was applied by adding  $2.2 \cdot 10^{10}$   
60  $^{13}\text{C}$ -labelled T4 phages to 200  $\mu\text{l}$  of sludge corresponding to  $10^8$  bacteria cells. The  
61 increase in density of the bacterial DNA of the  $^{12}\text{C}$  control bottle was then measured after  
62 the enumerated T4 phages decreased by 99%.

63 T4 phages were assimilated by bacteria. About 41% of the  $^{13}\text{C}$  atoms initially present in  
64 T4 phages were accounted for in the bacterial biomass. However, only nine out of the  
65 4046 microbial species - or more accurately Amplicon Sequence Variant (ASVs) - were  
66 labelled by the  $^{13}\text{C}$  initially contained in the T4 phages (Fig. 1), thus suggesting that the  
67 incorporation of T4 phage is not a widespread ability. This incorporation generated  
68 growth, since the total biomass increased 2 fold after 24h concomitantly with the  
69 disappearance of the T4 phages.

70 The two main degraders of T4 phages were ASV1 (*Aeromonas sp.*) and ASV2  
71 (*Tolumonas sp.*), which accounted for 5% and 29% of  $^{13}\text{C}$  atoms found in the bacterial  
72 biomass respectively. Both belong to the *Aeromonadaceae* family and exhibit strong  
73 growth rates. Indeed, both rose from undetectable levels to 51% of the biomass, while the  
74 density of their DNA increased because they incorporated  $^{13}\text{C}$  atoms from the isotopically

75 labelled T4 phages. For example, the  $2 \times 10^6$  *Aeromonas* cells present after 24h contained  
76 85% of  $^{13}\text{C}$  atoms in their DNA whose density shifted from 1.72 g/mL to 1.75 g/mL in  
77 the bottle with  $^{13}\text{C}$ -labeled T4 phages. The 16S rRNA sequences assigned to *Aeromonas*  
78 represented 19% and 8% of the total reads in the  $^{12}\text{C}$  and the  $^{13}\text{C}$  bottles respectively, thus  
79 revealing a consistent growth from initially undetectable levels.

80 In addition to the *Aeromonadaceae* family, two species (ASV12 and 21) belonging to the  
81 Ignavibacteriales PHOS-HE36 family, although labelled with medium strength (49 and  
82 71%) and negligible growth (0 and  $5.87 \times 10^6$  synthesized cells respectively), still gathered  
83 5% of the  $^{13}\text{C}$  atoms. The last 5 species with significant DNA density shifts (ASV7, 9, 20,  
84 67 and 79) accounted for the remaining 1% of  $^{13}\text{C}$  atoms but their weak labelling level  
85 may have resulted from indirect labelling.

86 To confirm the quality of *Aeromonas sp.* as a predator of T4 phages, an *Aeromonas*-  
87 selective medium was used for retrieving an *Aeromonas* colony from the initial sludge  
88 and called it *Aeromonas\_isolate\_007*. The analysis of the whole genome confirmed that  
89 this isolate belongs to an intermediate clade between *Aeromonas media* and *Aeromonas*  
90 *rivipollensis* species. *Aeromonas\_isolate\_007* was incubated with T4 phages as only  
91 substrate. Starting with 50 resting bacterial cells, the population reached  $1.6 \times 10^8$  cells  
92 after 24 hours at 20°C while consuming  $10^{11}$  T4 phages (Fig. 1C). No growth was  
93 observed when T4 phages were absent.

94 *Aeromonas sp.* can also capture T4 phages when their concentrations were comparable  
95 with environmental conditions:  $7 \times 10^4$  T4 phages/mL decreased to  $2 \times 10^3$  T4 phages/mL  
96 when incubated with *Aeromonas\_isolate\_007* cells (Fig 1C). No decrease in the T7 phage  
97 has been observed in similar experiments where the T4 phage was replaced by the T7  
98 phage.

## 99 Discussion

100 *Aeromonas* cells are present in virtually any environment(Janda and Abbott, 2010),  
101 including wastewater treatment plants where their abundance is around 0.1 % (Ye *et al.*,  
102 2012).

103 Interestingly, *Aeromonas* cells have an S-layer(Noonan and Trust, 1997) associated with  
104 lipopolysaccharides (Sleytr *et al.*, 2014) and an outer membrane protein C, which are  
105 known to bind the T4 phages to the surface of *E.coli* cells(Islam *et al.*, 2019). Once  
106 captured at the surface, the phage is likely degraded by several extracellular enzymes,  
107 including DNase and protease (Janda, 1985). For example, metallo- and serine- proteases  
108 found in *Aeromonas* are involved in the degradation of large molecules such as albumin,  
109 earning the nickname of ‘Jack-of-all-trades’ due to this enzymatic versatility(Seshadri *et*  
110 *al.*, 2006). Finally, *Aeromonas* possesses transporters to uptake the resulting amino acids  
111 and peptides (Seshadri *et al.*, 2006).

112 Bacterial predation on bacteriophages is rich in consequences because bacteriophages are  
113 ultimate predators at the top of all food chains since they are not hunted. Indeed  
114 bacteriophage decay is mainly considered abiotic via adhesion to particulate material,  
115 chemical inactivation or degradation by solar radiation or passive grazing by  
116 flagellates(González and Suttle, 1993). In the oceans, this predation likely allows for the  
117 upper levels of the trophic chain carbon to access to the 7% of dissolved nitrogen, the 5%  
118 of phosphorus and the 1% of dissolved organic carbon contained in the viral particles  
119 (Jover *et al.*, 2014).

120 Furthermore, the diversity in bacteriophages could be partly related to the presence of  
121 phage-specific bacterial bacteriophage-hunters. Indeed, the bacterial predators of T4  
122 phages do not appear to consume T7 bacteriophages. Therefore, brutal increase of a  
123 specific phage in the environment could be specifically controlled by a phage-eating  
124 bacterium, forming a killing-the-killer loop.

125 In conclusion, bacteria that are capable of eliminating specific viruses changes our vision  
126 of the food webs and represent a noteworthy avenue to explore to control harmful viruses  
127 such COVID-19, bacteriophages that disrupt dairy fermentations or rotaviruses causing  
128 diarrhoea.

129

130 Declarations



131 Ethics approval and consent to participate

132 Not Applicable

133 Consent for publication

134 Not Applicable

135 Availability of data and materials

136 High-throughput sequencing data have been deposited on NCBI

137 (<https://www.ncbi.nlm.nih.gov/bioproject>) under accession number PRJNA650397

138 and the genome of *Aeromonas\_isolate\_007* is accessible with the BioSample

139 accession number SAMN17689348.

140 Competing Interests statement

141 The authors declare that they have no competing interests.

142 Funding

143 The work was funded by the French National Research Institute for Agriculture, Food

144 and Environment (INRAE).

145 Contributions

146 J.J.G., O.Z., A.B. and N.H. designed and performed the experiments; J.J.G., O.Z., L.C.  
147 and M.A. performed computational experiments; J.J.G., O.Z., L.C., M.A. and M.A.P.  
148 contributed lineaging data and expertise; J.J.G. and O.Z. prepared the manuscript with  
149 assistance from all authors; J.J.G. and O.Z. supervised and directed the research.

## 150 Acknowledgments

151 We thank Caroline Achard for insights on bacteriophage capture, Martin Beaumont and  
152 Amira Bousleh for the qPCR of the internal standard. Electronic microscopy work has  
153 benefited from the facilities and expertise of MIMA2 MET – GABI, INRA,  
154 Agroparistech, 78352 Jouy-en-Josas, France. Sequencing was performed in collaboration  
155 with the GeT core facility, Toulouse, France (<http://get.genotoul.fr>) supported by France  
156 Génomique National infrastructure, funded as part of “Investissement d’avenir” program  
157 managed by the Agence Nationale pour la Recherche (contract ANR-10-INBS-09).

158 Figure 1 was created by Biorender.

## 159 Authors' information

160 JJG directed the PhD of OZ in bacterial ecology in France. In a following postdoc, OZ  
161 learned stable-isotope probing in sludge in Australia and was granted a small project to  
162 study the adsorption of T2 phages in the light of electrostatics. The combination of SIP  
163 and phage expertise turned out useful to answer JJG’s question about the predation of  
164 phages together with AB, which has expertise in producing purified isotopically-labeled

165 phages and MAP, which could confirm the results in pure culture with JJG since an  
166 isolate was successfully isolated from the sample. MA's expertise in genome annotation  
167 was put to use to speculate about the mechanisms involved in the capture, digestion and  
168 assimilation of T4 phages by bacteria.

169

## 170 References

171

- 172 Bar-On YM, Phillips R, Milo R (2018). The biomass distribution on Earth. *Proceedings of the*  
173 *National Academy of Sciences* **115**: 6506-6511.
- 174 Brown JM, Labonté JM, Brown J, Record NR, Poulton NJ, Sieracki ME *et al* (2020). Single Cell  
175 Genomics Reveals Viruses Consumed by Marine Protists. *Front Microbiol* **11**: 524828.
- 176 Comeau AM, Krisch HM (2008). The capsid of the T4 phage superfamily: the evolution, diversity,  
177 and structure of some of the most prevalent proteins in the biosphere. *Mol Biol Evol* **25**: 1321-  
178 32.
- 179 Gonzalez JM, Suttle CA (1993). Grazing by Marine Nanoflagellates on Viruses and Virus-Sized  
180 Particles - Ingestion and Digestion. *Marine Ecology-Progress Series* **94**: 1-10.
- 181 González JM, Suttle CA (1993). Grazing by marine nanoflagellates on viruses and virus-sized  
182 particles: ingestion and digestion. *Marine Ecology Progress Series* **94**: 1-10.
- 183 Islam MZ, Fokine A, Mahalingam M, Zhang Z, Garcia-Doval C, van Raaij MJ *et al* (2019).  
184 Molecular anatomy of the receptor binding module of a bacteriophage long tail fiber. *PLOS*  
185 *Pathogens* **15**: e1008193.
- 186 Janda JM (1985). Biochemical and exoenzymatic properties of *Aeromonas* species. *Diagnostic*  
187 *Microbiology and Infectious Disease* **3**: 223-232.

- 188 Janda JM, Abbott SL (2010). The genus *Aeromonas*: taxonomy, pathogenicity, and infection. *Clin*  
189 *Microbiol Rev* **23**: 35-73.
- 190 Jover LF, Effler TC, Buchan A, Wilhelm SW, Weitz JS (2014). The elemental composition of virus  
191 particles: implications for marine biogeochemical cycles. *Nat Rev Microbiol* **12**: 519-28.
- 192 Mondal T, Rouch DA, Thurbon N, Smith SR, Deighton MA (2015). Factors affecting decay of  
193 *Salmonella* Birkenhead and coliphage MS2 during mesophilic anaerobic digestion and air drying  
194 of sewage sludge. *J Water Health* **13**: 459-72.
- 195 Nasser AM, Glozman R, Nitzan Y (2002). Contribution of microbial activity to virus reduction in  
196 saturated soil. *Water Res* **36**: 2589-95.
- 197 Noonan B, Trust TJ (1997). The synthesis, secretion and role in virulence of the paracrystalline  
198 surface protein layers of *Aeromonas salmonicida* and *A. hydrophila*. *FEMS Microbiol Lett* **154**: 1-  
199 7.
- 200 Seshadri R, Joseph SW, Chopra AK, Sha J, Shaw J, Graf J *et al* (2006). Genome Sequence of  
201 *Aeromonas hydrophila* ATCC 7966<sup>T</sup>: Jack of All Trades. *Journal of Bacteriology* **188**:  
202 8272-8282.
- 203 Sleytr UB, Schuster B, Egelseer E-M, Pum D (2014). S-layers: principles and applications. *FEMS*  
204 *Microbiology Reviews* **38**: 823-864.
- 205 Ye L, Zhang T, Wang T, Fang Z (2012). Microbial structures, functions, and metabolic pathways in  
206 wastewater treatment bioreactors revealed using high-throughput sequencing. *Environ Sci*  
207 *Technol* **46**: 13244-52.
- 208
- 209
- 210
- 211
- 212

213 **Figure 1. Bacterial growth on T4 phages. A; Identification of <sup>13</sup>C-labeled**  
214 **bacteria:** the <sup>13</sup>C-labeled T4 (red) were incubated with a microbial community of  
215 wastewater treatment plant in the same conditions as the <sup>12</sup>C control (blue). **B;**  
216 **Bacteria present in each sample:** the barplots shows the growth of each ASVs  
217 based on 16S rDNA copies, detailing the nine bacteria assimilating T4  
218 phages. **C; The density plots show the shift in density for ASV1 (*Aeromonas***  
219 **sp.),** which was abundant in both bottles after 24h. **D; <sup>13</sup>C labelling level after**  
220 **24h:** the <sup>13</sup>C-labeling level (left Y-axis), computed from the individual density  
221 shifts (right Y-axis), is reported against the initial abundance of the ASVs (X-  
222 axis). The volume of the spheres represents the abundance of each ASV in  
223 the <sup>13</sup>C bottle. **E; *Aeromonas* sp. growth on T4 phages:**  
224 *Aeromonas\_isolate\_007* grew on T4 phages as sole carbon and nitrogen source.  
225 When a few *Aeromonas* cells were incubated with 10<sup>11</sup> T4 phages, the colony  
226 forming units (brown) increased while the plaque-forming units (blue) decreased.  
227

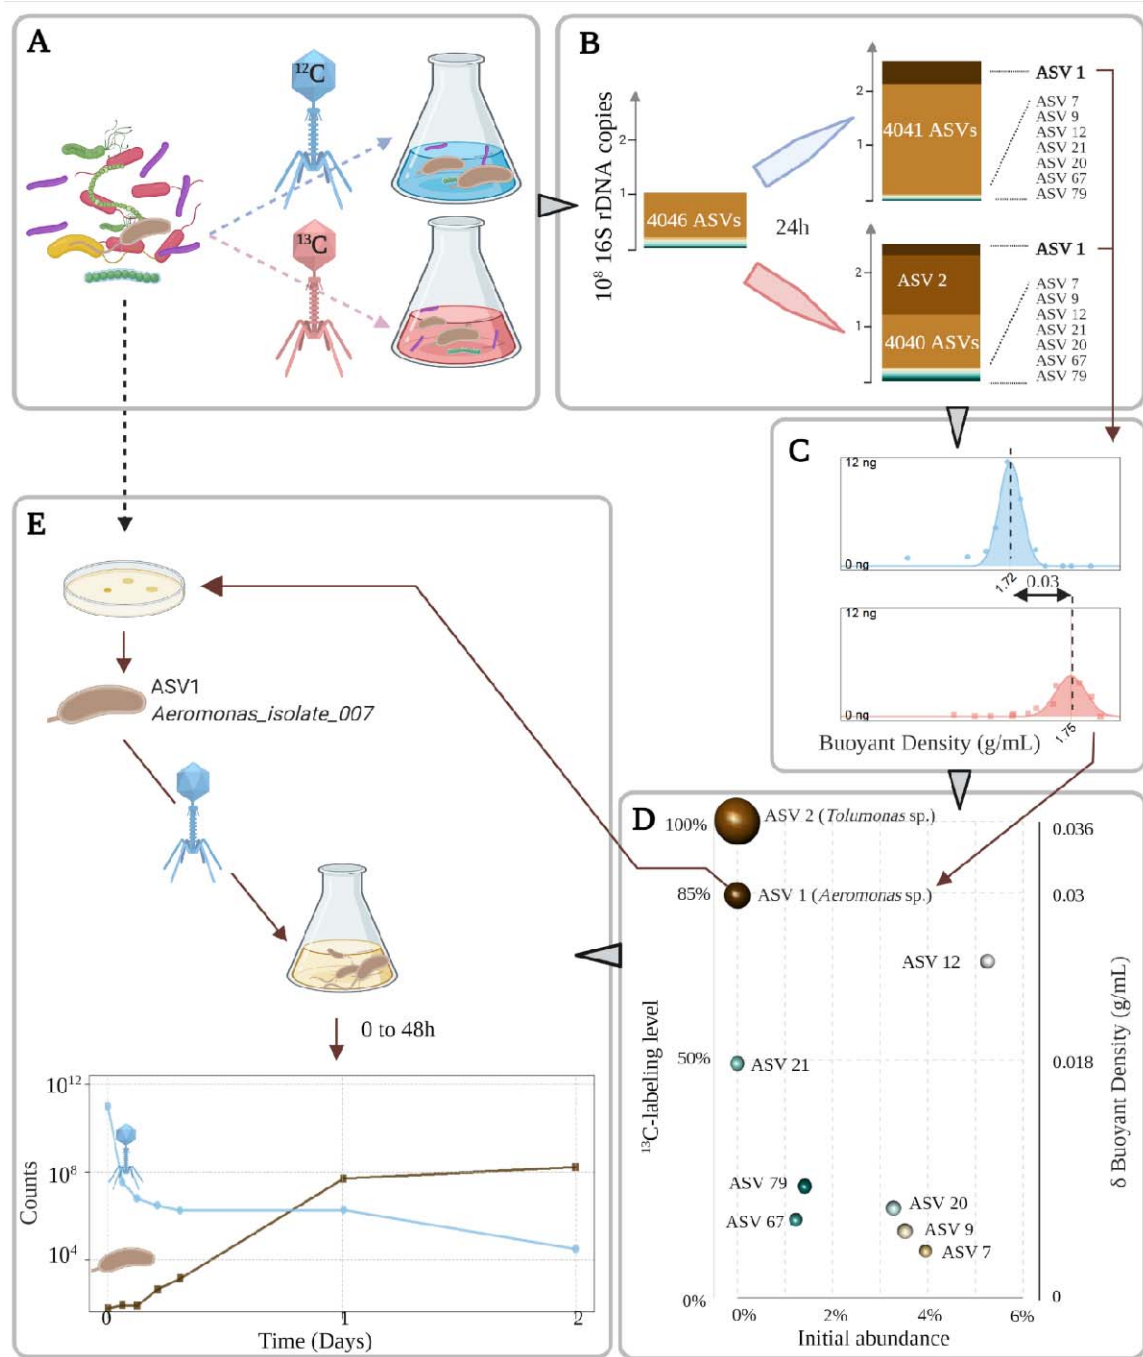

228
